# Supplementary material for: Mesoporous ZnO thin films obtained from molecular layer deposited “zincones”
Source: Royal Society of Chemistry journal article supplement (doi:10.1039/c9dt02824b), 2019-01-01
Supplement: c9dt02824b1.pdf [file c9dt02824b1.pdf]

Supporting Information of

### Mesoporous ZnO thin films obtained from molecular layer deposited “zincones”

Alberto Perrotta<sup>a)\*</sup>, Richard Berger<sup>a)</sup>, Fabian Muralter<sup>a)</sup>, Anna Maria Coclite<sup>a)</sup>

a) Institute of Solid State Physics, NAWI Graz, Graz University of Technology, Petersgasse 16,  
8010 Graz, Austria

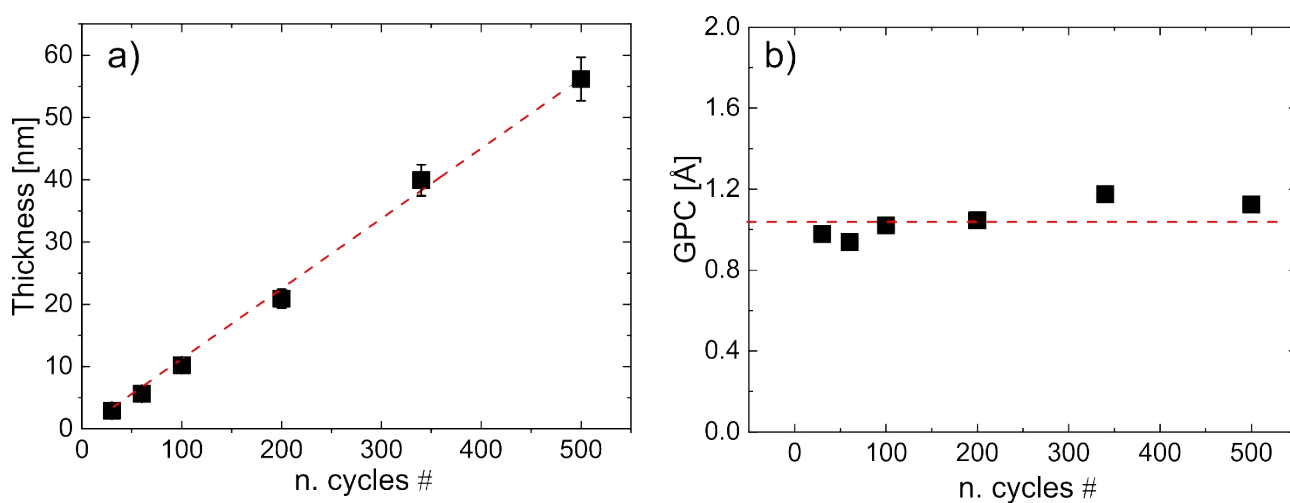

**Figure S1.** a) thickness vs. n. of cycles for the MLD zincone layer; b) the GPC as a function of the number of cycles. The linearity of the growth is shown up to 500 cycles.

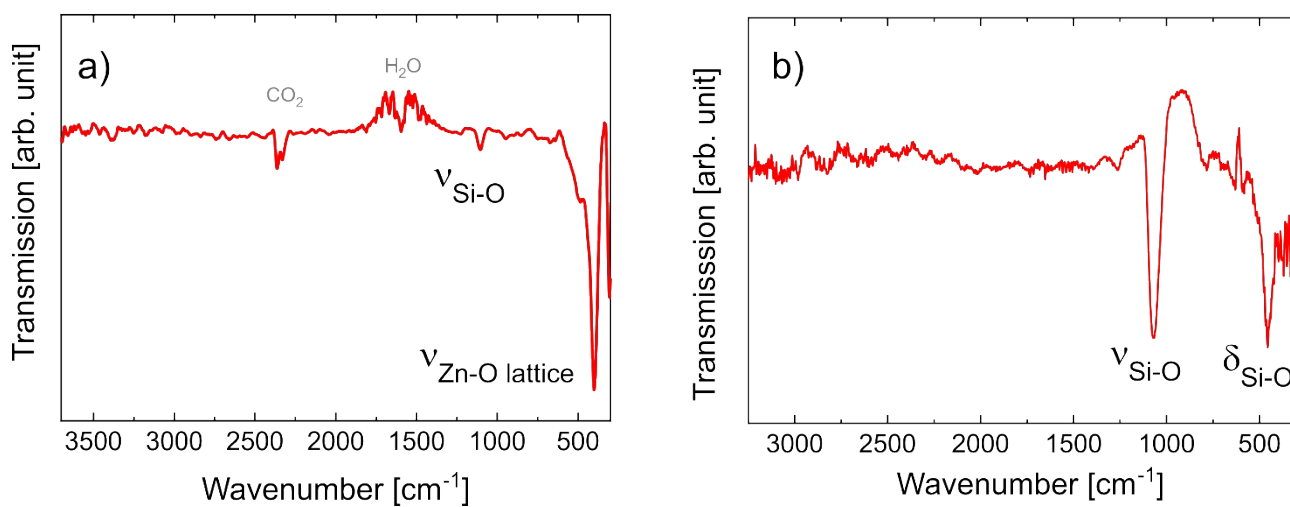

**Figure S2.** FT-IR spectra of a) 32-nm-thick zincone layer after calcination at 400 °C; b) bare *c*-Si substrate after calcination at 600 °C.

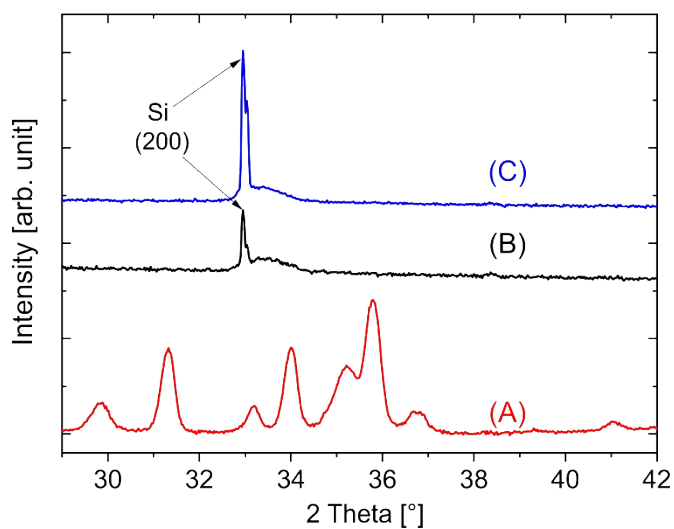

**Figure S3.** XRD scan for A) Sample stage, B) Si wafer with 1.3 nm native oxide, C) Zincone film before heating (amorphous film).

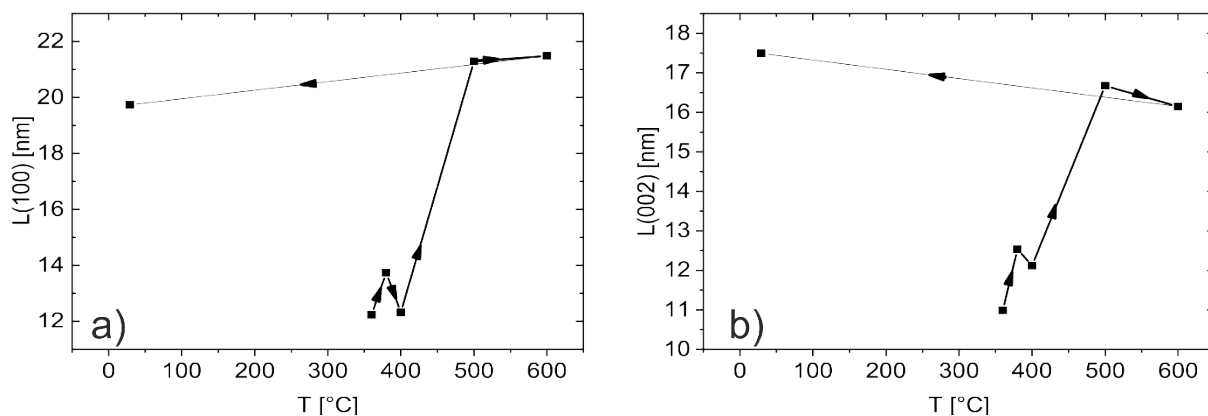

**Figure S4.** Growth of the 100 and 002 crystallites during the calcination of the zincone layer. Also the value after calcination at room temperature is reported.
